# Supplementary material for: Free-standing graphene films decorated with lithiophilic particles as host electrodes for lithium plating/stripping in anode-less lithium metal batteries
Source: Royal Society of Chemistry journal article supplement (doi:10.1039/d4ta07788a), 2025-01-01
Supplement: d4ta07788a2.pdf [file d4ta07788a2.pdf]

## **Supplementary information**

### **Free-standing graphene films decorated with lithiophilic particles as host electrode for lithium plating/stripping in anode-less lithium metal batteries**

Mingliang Bai,<sup>a</sup> Min Zhong,<sup>\*a</sup> Wenzhuo Shen,<sup>a</sup> Jiali Zhang,<sup>a</sup> and Shouwu Guo<sup>\*a</sup>

<sup>a</sup> Department of Electronic Engineering, School of Electronic Information and  
Electrical Engineering, Shanghai Jiao Tong University, Shanghai 200240, China

\* Corresponding author E-mail address:

Min Zhong (zomi@sjtu.edu.cn), Shouwu Guo (swguo@sjtu.edu.cn)

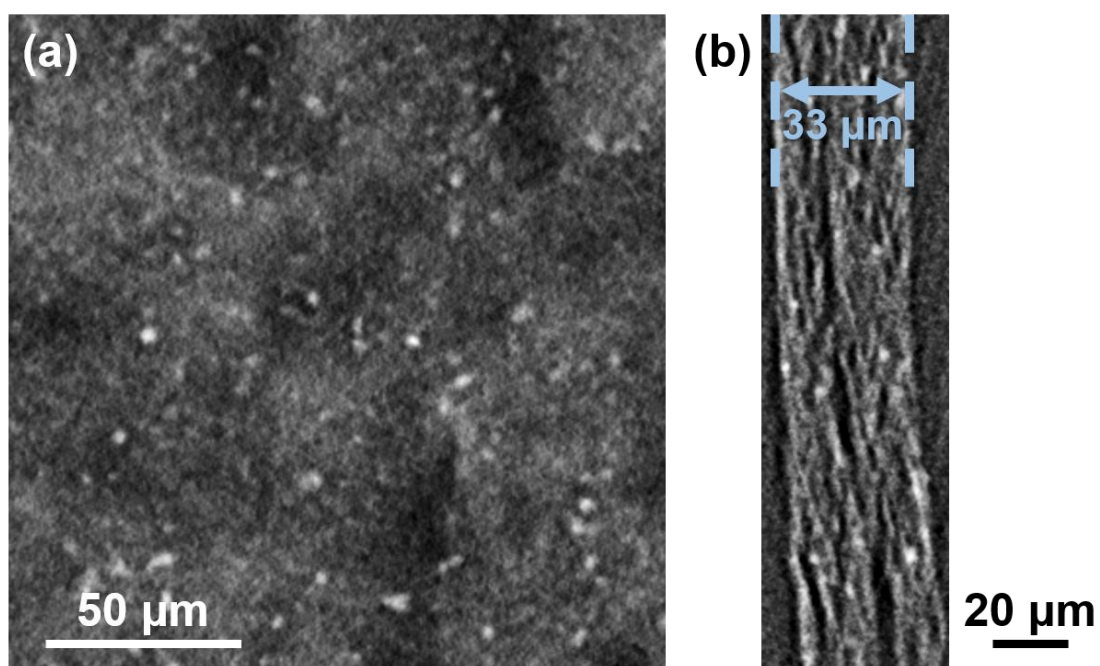

Fig. S1. (a) Parallel and (b) Cross-sectional XRM imaging slices of LAG film.

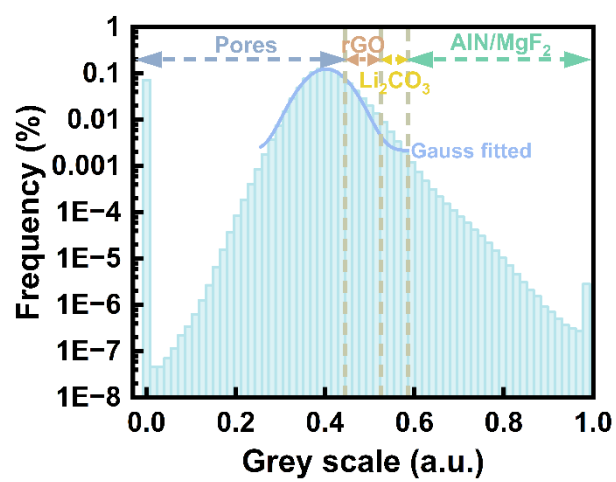

Fig. S2. Grey-scale distribution of the region corresponding to Fig. 1b.

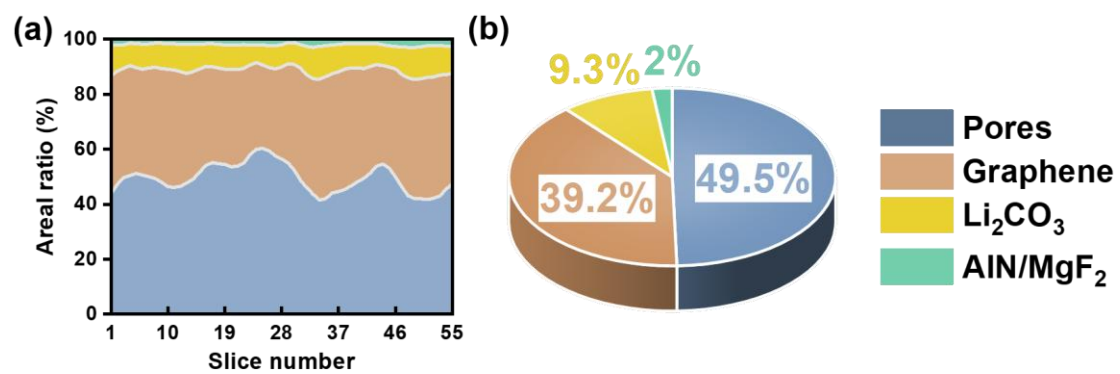

Fig. S3. (a) Areal ratios of different components in each parallel XRM slice of LAG film.  
 (b) Average areal ratios of different components in LAG film.

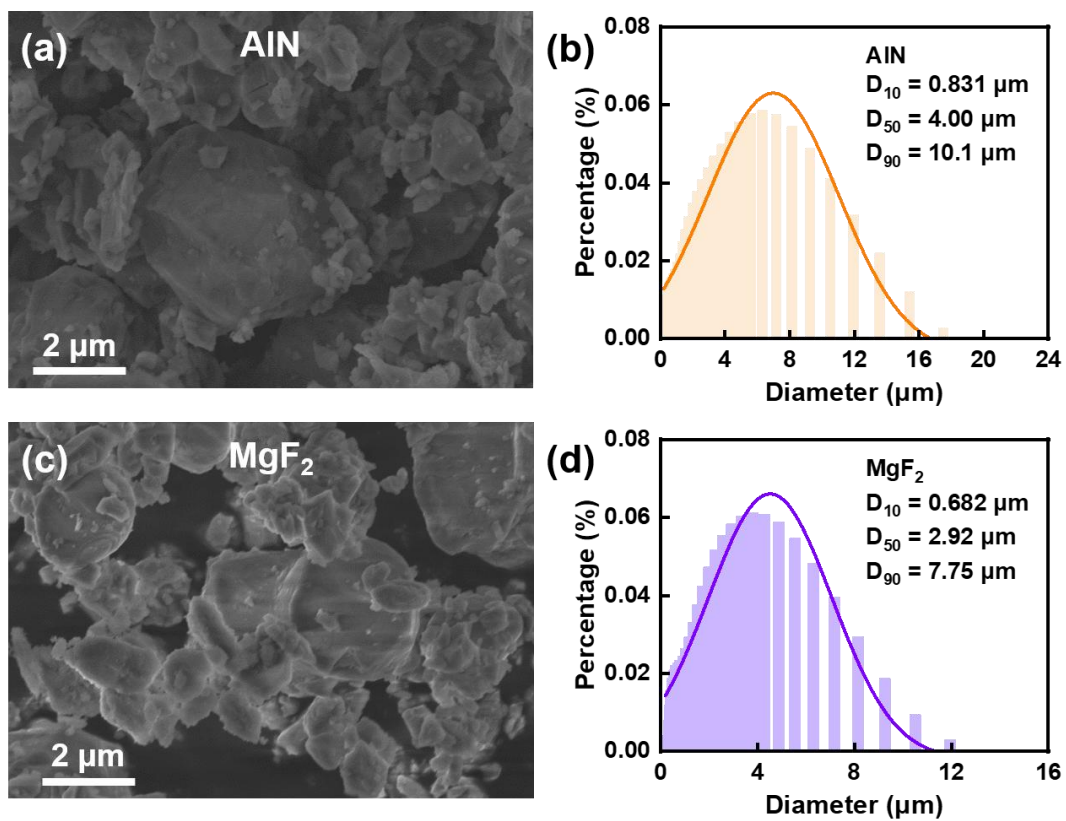

Fig. S4. SEM images and particle size distributions of originally added (a, b) AIN and (c, d) MgF<sub>2</sub> particles.

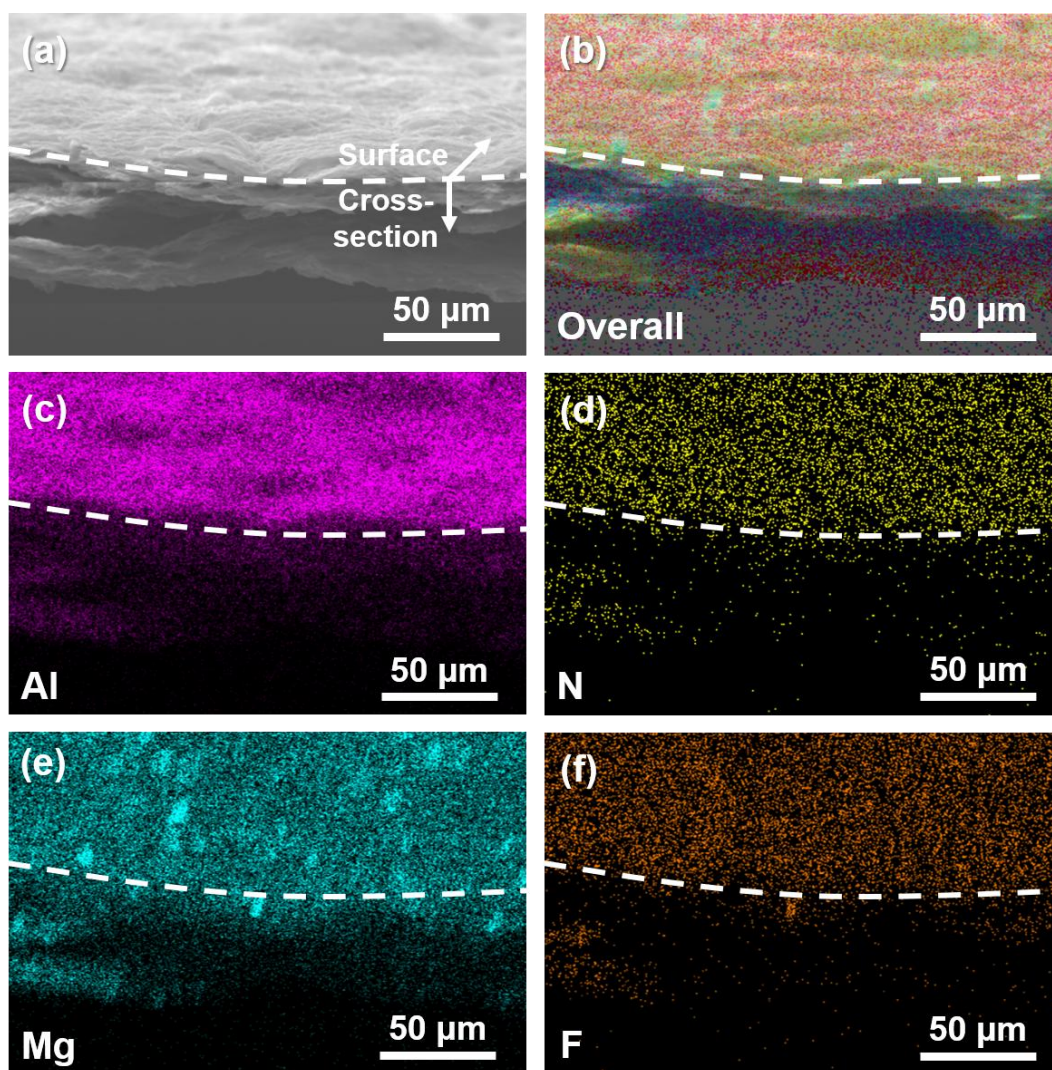

Fig. S5. (a) SEM image and (b-e) EDS mapping results of LAG film.

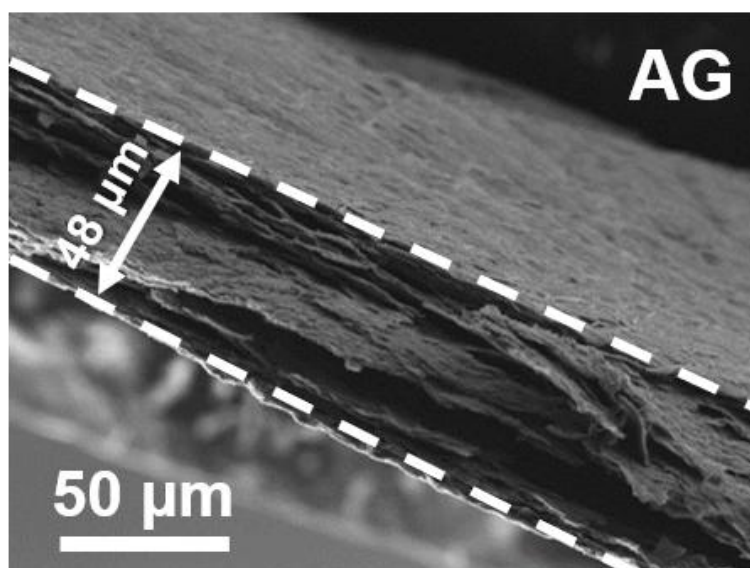

Fig. S6. Cross-sectional SEM image of the AG film.

To build up 3D porous-scaffold structure, fast-heating method is utilized to reduce GO. A mass of  $\text{H}_2\text{O}$  molecules constrained between GO sheets rapidly vapor and burst out with  $\text{CO}_2$ , which separate graphene sheets and forms porous structure in a few seconds. Moreover, alkalization of GO precursor solution is induced, since that GO is reported to be of more thermal activity when pretreated with  $\text{OH}^-$ . According to previous studies, effects of pH on decomposition kinetics of GO are primarily due to epoxy ring opening/closing reactions upon alkalization/acidification.<sup>1, 2</sup> After alkalization pretreatment, the AG film maintains an integrated and relatively uniform multilayer-film structure with the thickness of 48 μm (Fig. S6). With the addition of AlN and  $\text{MgF}_2$ , the LAG film has a more even porous structure, with the thickness of 34 μm (Fig. 1d).

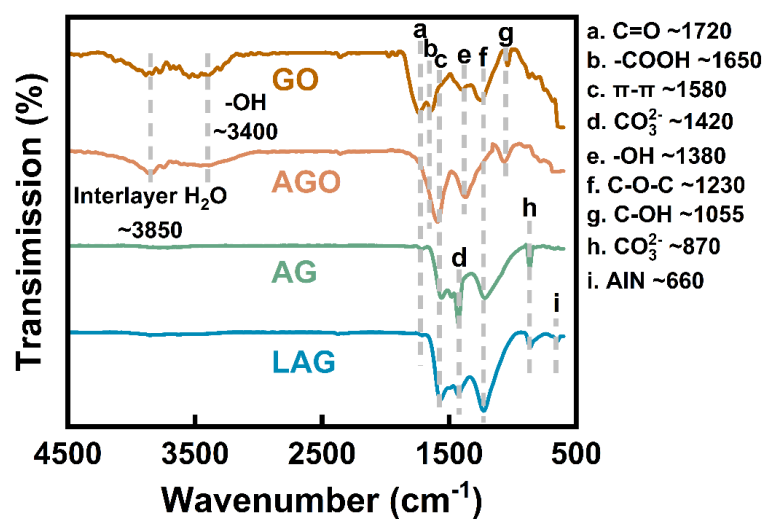

Fig. S7. ATR-IR spectra of GO, AGO, AG, and LAG films.



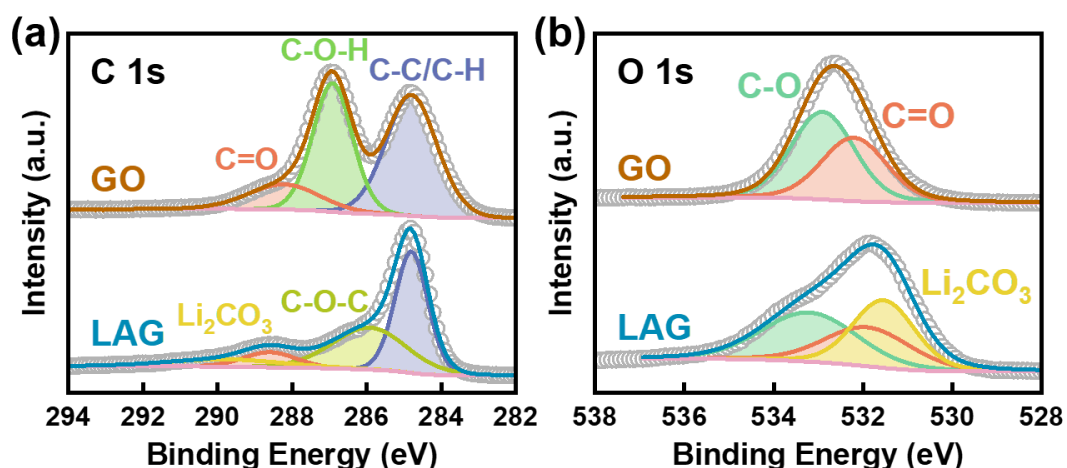

Fig. S8. XPS spectra of (a) C 1s and (b) O 1s of GO and LAG films.

The hyperfine C 1s spectra, Fig. S8a, show the intensity of C 1s peak of C-O (C-O-H at 286.8 and C-O-C at 286.2 eV) decreasing from 43% to 36%, and the one of C=O (288.2 eV) descending from 14% to 9%. The decreasing intensities of C-O (533 eV) and C=O (532.1 eV) peaks are also obtained in O 1s spectra (Fig. S8b), from 57% to 38% and 43% to 27%, respectively. Meanwhile, C 1s and O 1s peaks appear at 289.8 and 531.5 eV correlated to  $\text{Li}_2\text{CO}_3$  can also be observed clearly. These results imply that during the thermal reduction C=O and C-O groups may be converted into  $\text{CO}_2$ , which reacts with residual LiOH forming  $\text{Li}_2\text{CO}_3$  and  $\text{H}_2\text{O}$ . And the as-generated  $\text{H}_2\text{O}$  is released instantly, leaving the pores within the LAG.

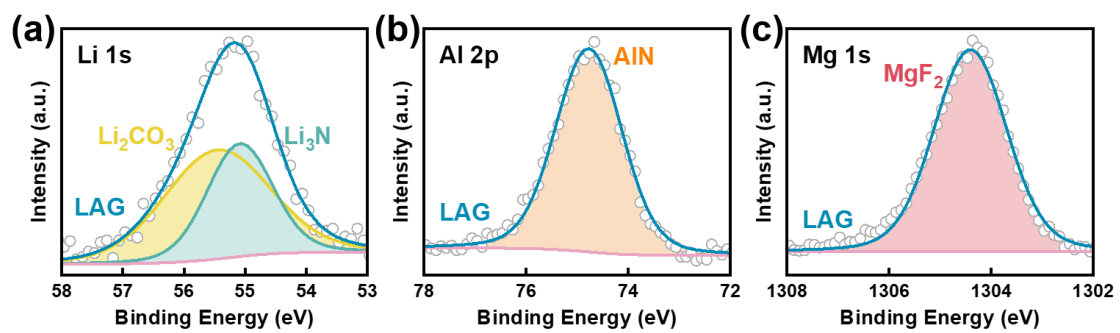

Fig. S9. XPS spectra of (a) Li 1s, (b) Al 2p and (c) Mg 1s of LAG film.

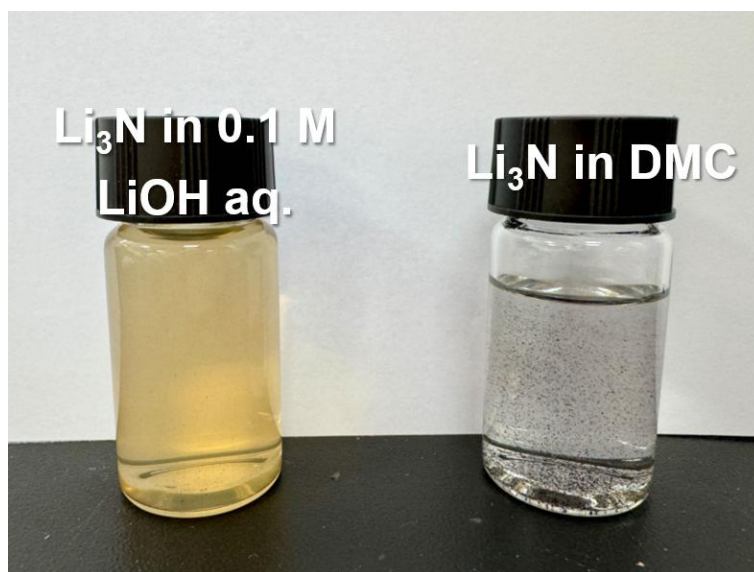

Fig. S10. Li<sub>3</sub>N dispersed in 0.1 M LiOH aqueous solution and DMC for zeta potential tests.

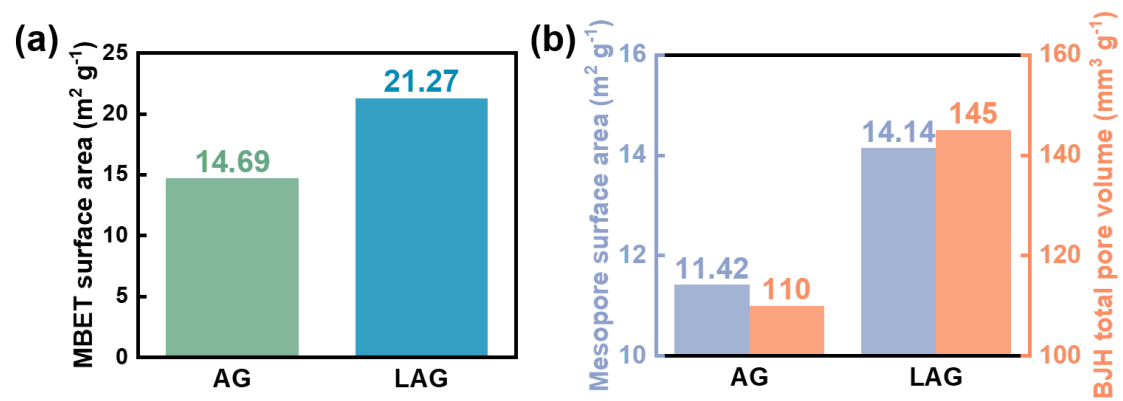

Fig. S11. (a) Multi-point BET surface areas of AG and LAG films. (b) Mesopore surface areas and BJH total pore volumes of AG and LAG films.

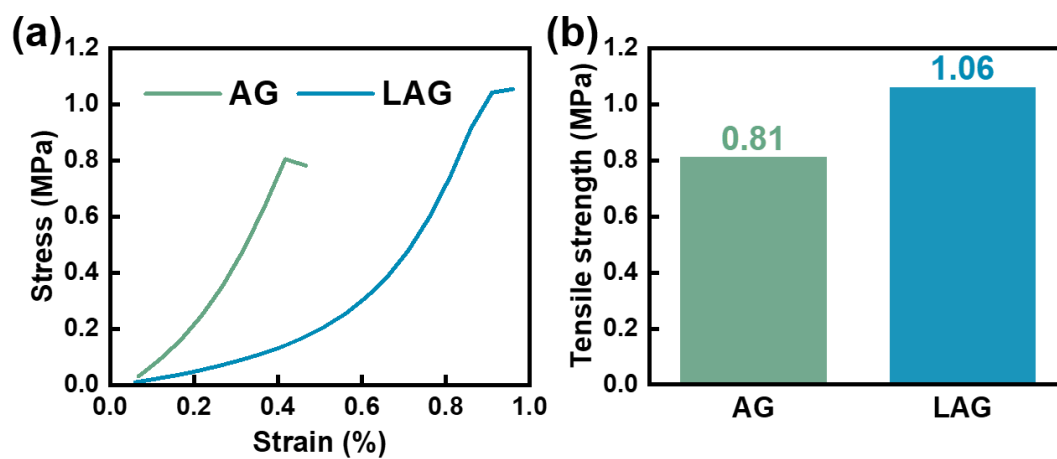

Fig. S12. (a) Stress-strain curves and (b) tensile strengths of AG and LAG films.

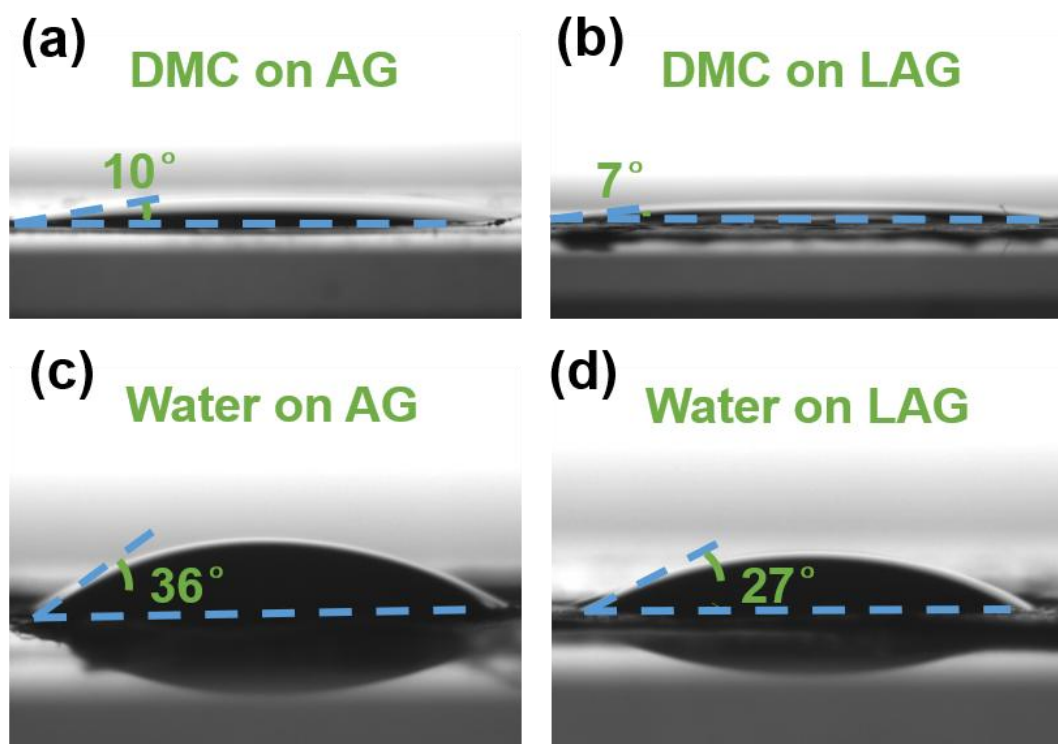

Fig. S13. Contact angles of (a, b) DMC and (c, d) water.

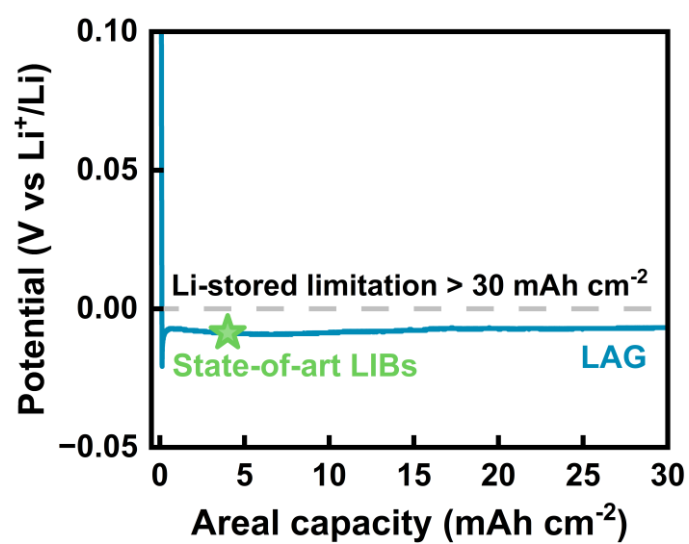

Fig. S14. Long-term lithium plating GCD curves of LAG film at 0.5 mA cm<sup>-2</sup>.

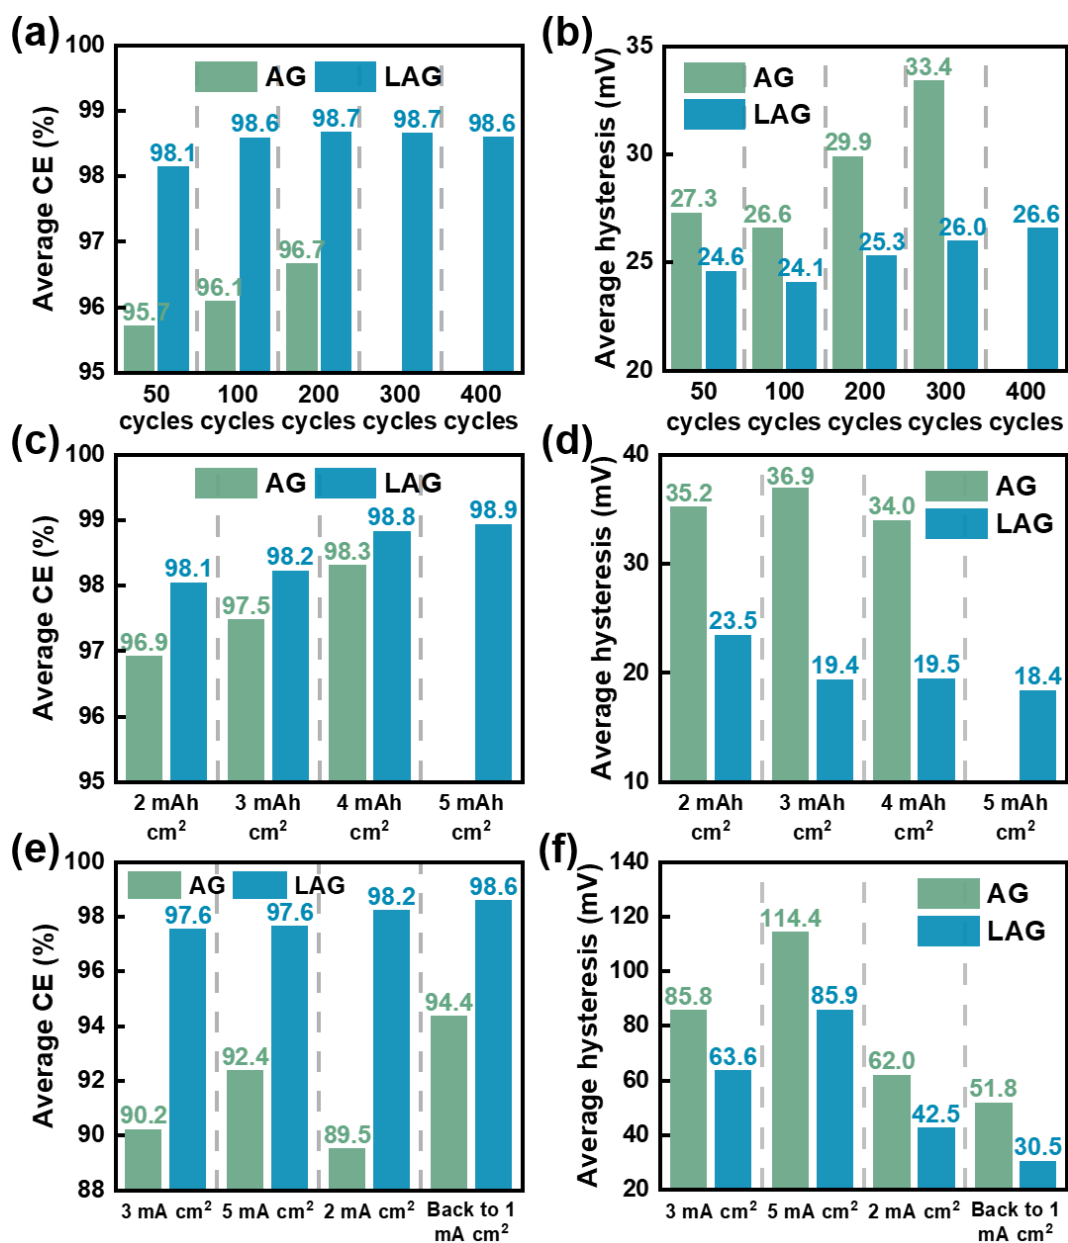

Fig. S15. (a, c, e) Average CEs and (b, d, f) average hysteresis of half-cells.



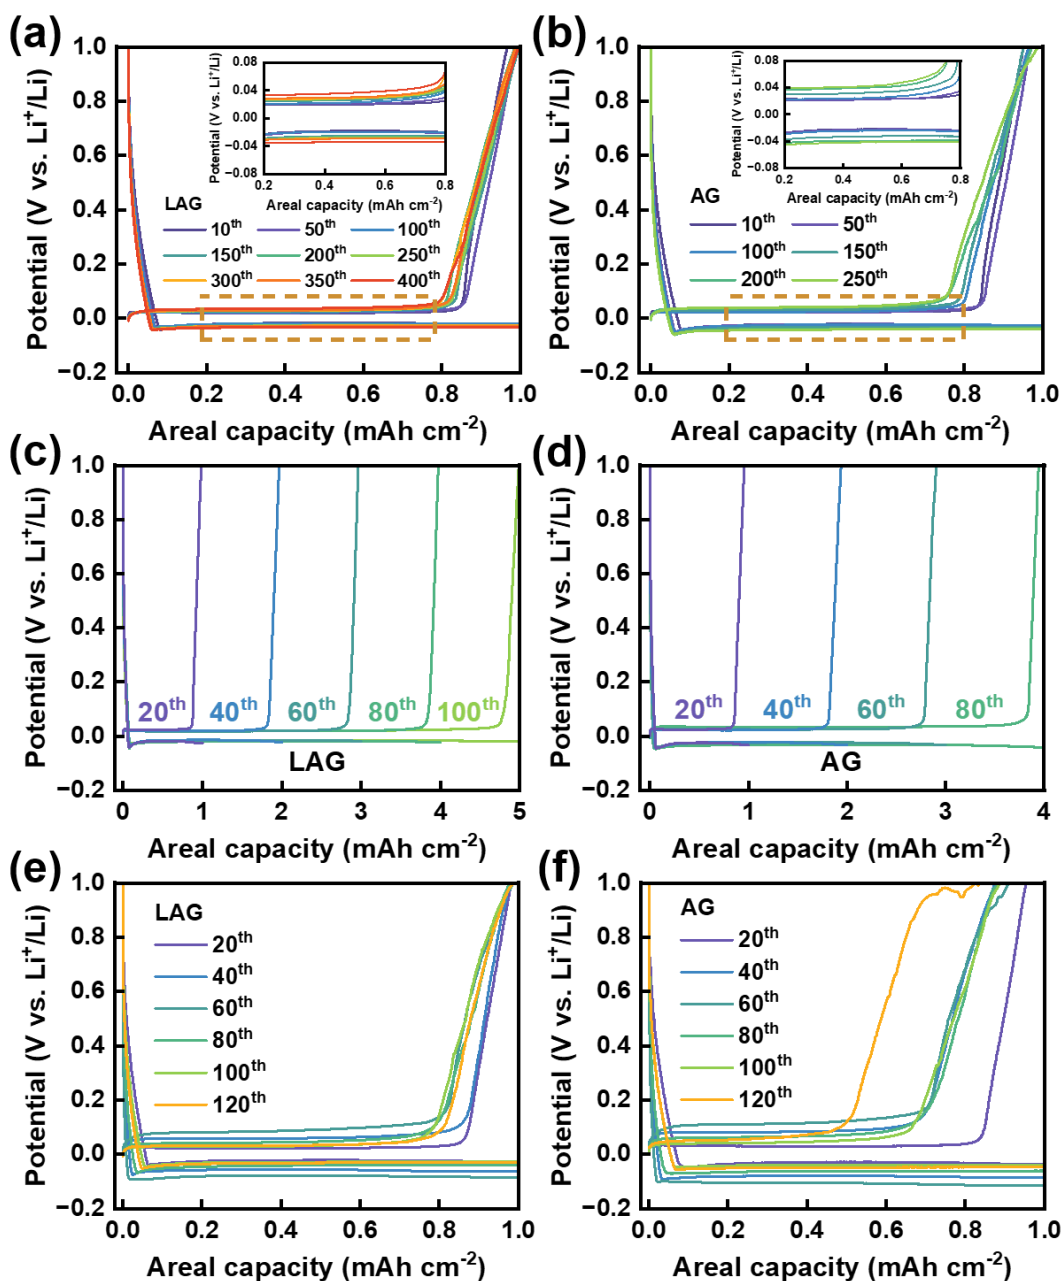

Fig. S16. GCD curves of (a) LAG and (b) AG films at  $1 \text{ mA cm}^{-2}$  and  $1 \text{ mAh cm}^{-2}$ , (c) LAG and (d) AG films at  $1 \text{ mA cm}^{-2}$  and  $1$  to  $5 \text{ mAh cm}^{-2}$ , (e) LAG and (f) AG films at  $1$  to  $5 \text{ mA cm}^{-2}$  and  $1 \text{ mAh cm}^{-2}$ .

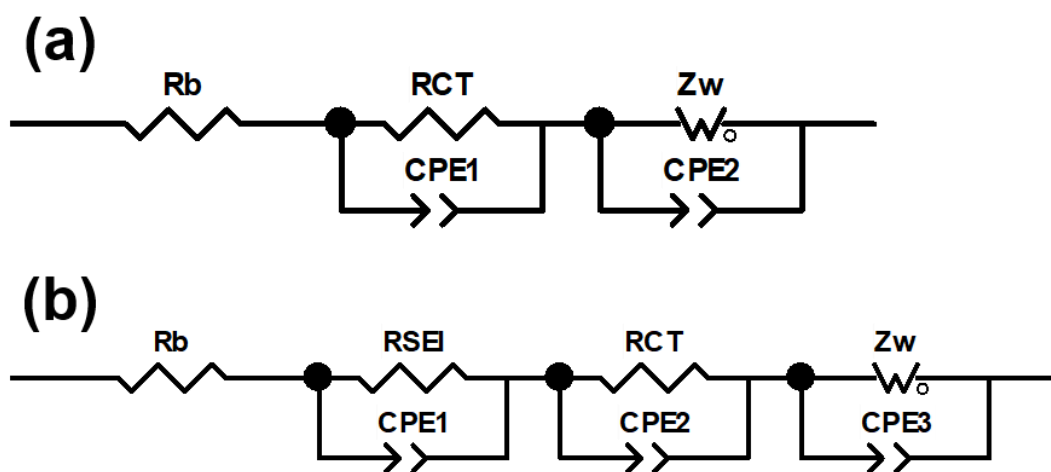

Fig. S17. The equivalent circuit of cells (a) before cycle and (b) after cycling.

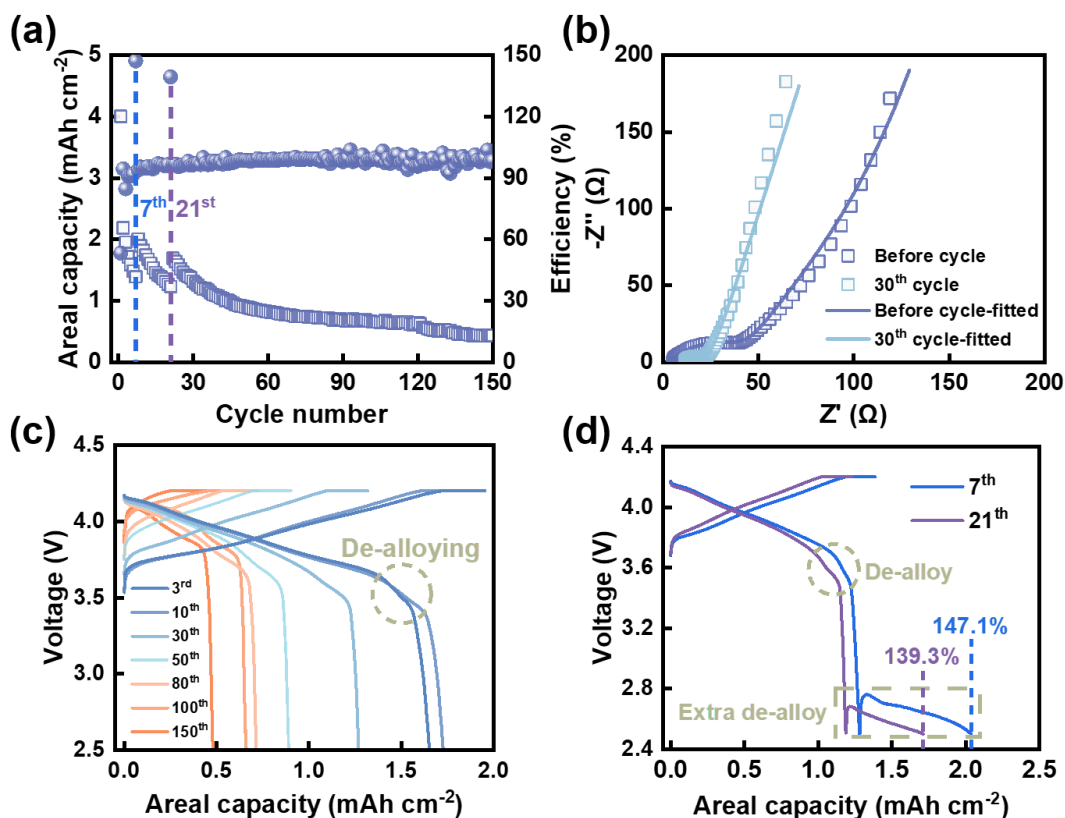

Fig. S18. (a) Cycling performance, (b) Fitted EIS curves, and GCD curves of (c) follow-up cycles, (d) the 7<sup>th</sup> and 21<sup>st</sup> cycles of LA103Z||NCM811 cell under carbonate electrolyte with FEC at 0.5C//0.5C.

Different from LAG||NCM811 and LAG/LA103Z||NCM811 cells, LA103Z||NCM811 cell shows a rapid capacity decline within the initial 10 cycles, which is attributed to uncontrollable interfacial side-reaction of the alloy anodes (Fig. S18c). As the capacity decreases, LA103Z||NCM811 cell represents aperiodic capacity recoveries at the 7<sup>th</sup> and 21<sup>st</sup> cycles with CEs exceeding 130%, which might be due to the irregular delithiation of intrinsic lithium of LA103Z foil (Fig. S18d). However, such a sudden huge capacity improvement during AL-LMB cycling is not observed in LAG/LA103Z||NCM811 cell, indicating that no irregular de-alloying occurs on LA103Z in the presence of LAG. Additionally, LA103Z||NCM811 cell exhibits higher resistance at SOC = 0% after the 30<sup>th</sup> cycle caused by uncontrollable SEI growth on the unprotected surface (Fig. S18b, Table S3).

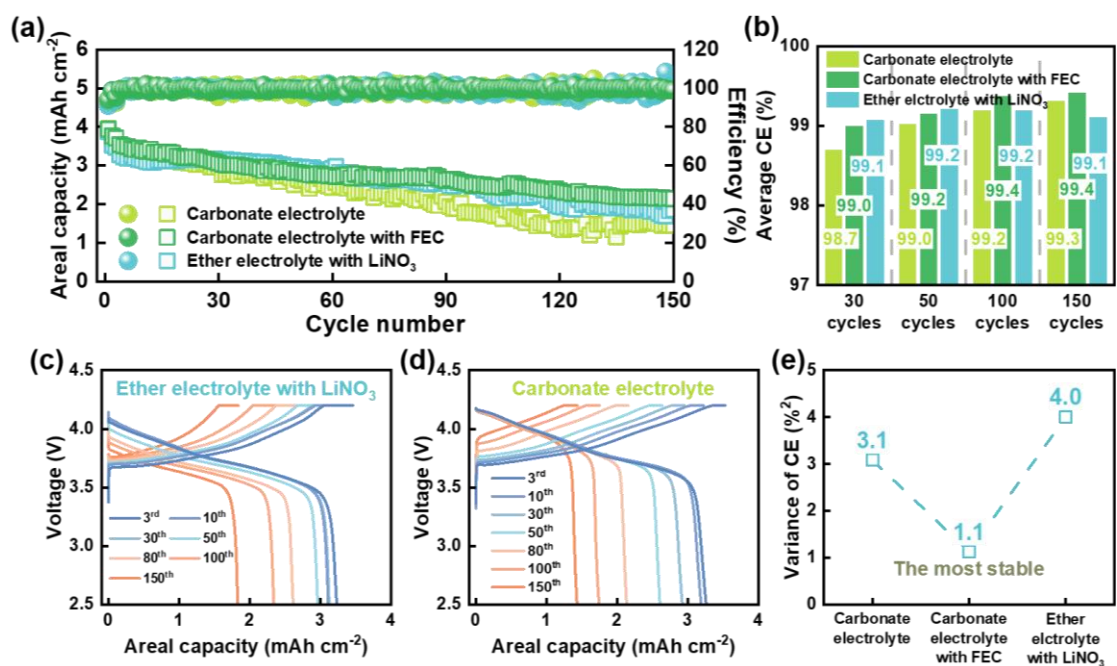

Fig. S19. Cycling performances of LAG/LA103Z||NCM811 cells under various electrolytes at 0.5C//0.5C. (a) CEs and areal capacities. (b) Average CEs. (c-d) GCD curves. (e) Variance of CEs among 150 full-cell cycles.

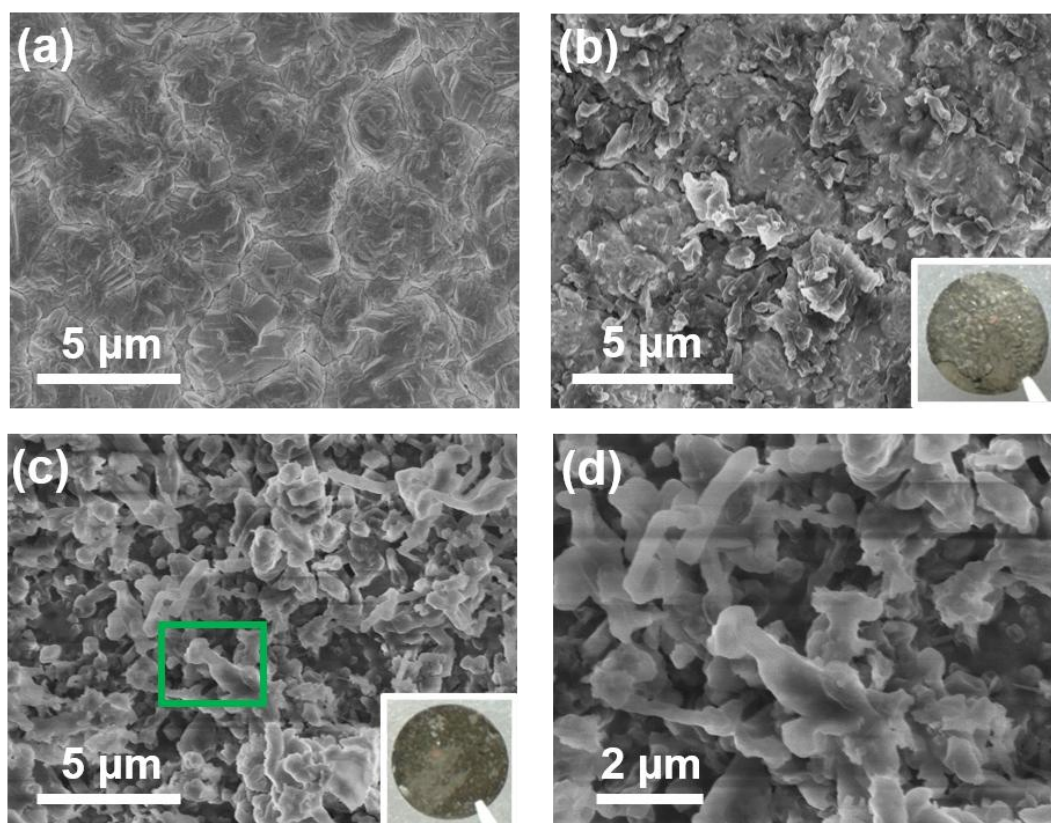

Fig. S20. SEM images of Cu foil (a) before cycle, (b) at SOC = 0%, and (c) SOC = 100% after the 30th full-cell cycle, inset with optical images of the corresponding electrode. (d) The enlarged SEM images of green area.

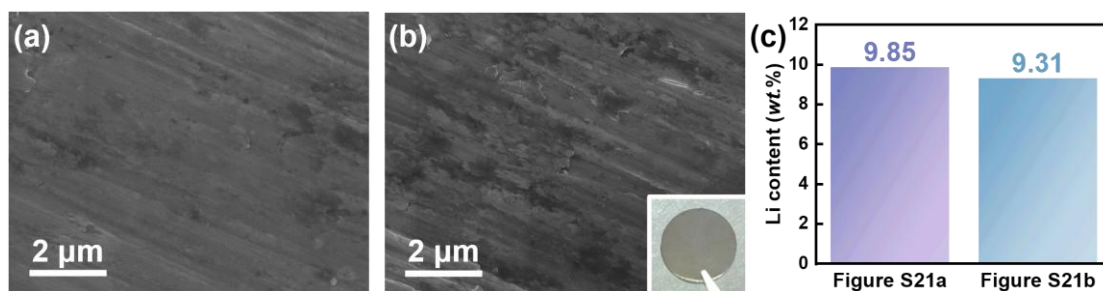

Fig. S21. SEM images of LA103Z surfaces attached to LAG (a) before cycle and (b) at SOC = 0% after the 30th full-cell cycle, inset with optical image of the corresponding surface. (c) Li contents in LA103Z correspondingly.

Fig. S21a and b compare the surficial morphologies of LA103Z foil before cycle and at SOC = 0% after the 30th full-cell cycle. Clearly, after lithium plating/stripping cycles, the surface of LA103Z is preserved as smooth as that before cycling. At the same time, the Li contents in LA103Z foil at different stages are measured using ICP-OES measurement, and the results are summarized in Fig. S21c. Notably, the Li content of LA103Z is about 9.85 wt% initially, while it changes to 9.31 wt% after 30 cycles, showing a slight Li loss during cycling, 0.54 wt%. The slight Li loss of LA103Z after 30 cycles is attributed to continuous Li supplement, which accounts for distinguished improvement of capacity retention between LAG||NCM811 and LAG/LA103Z||NCM811 cells.

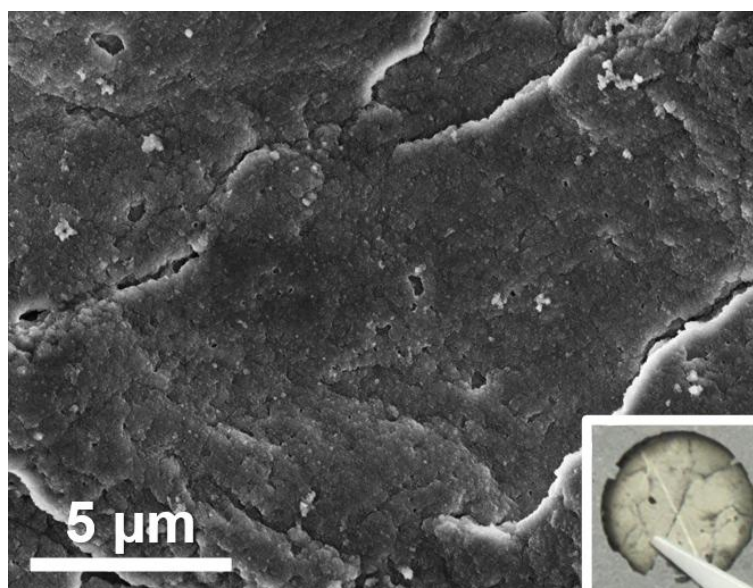

Fig. S22. SEM image of LA103Z surface at SOC = 0% after the 30th cycle of LA103Z||NCM811 cell.

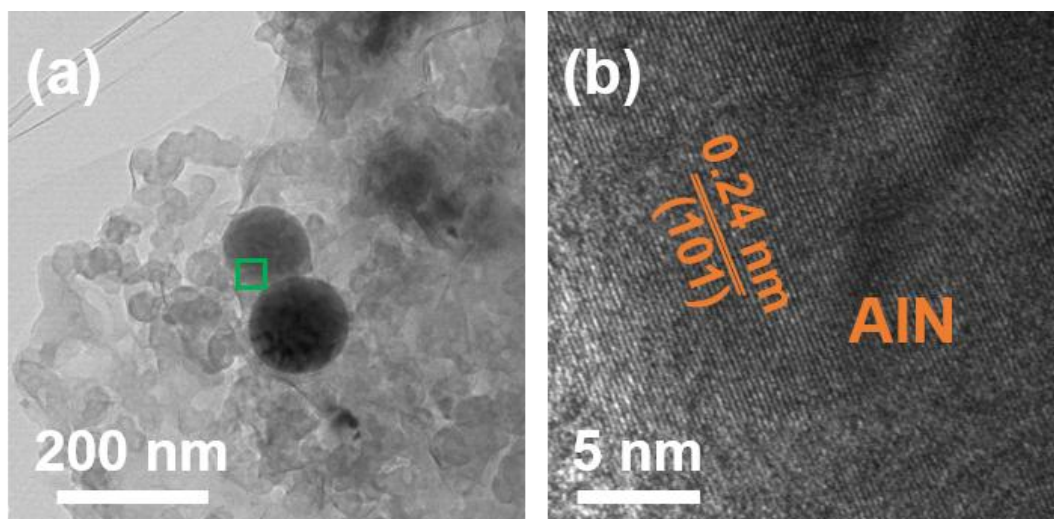

Fig. S23. TEM and HRTEM images of LAG at SOC = 0% after the 30th full-cell cycle.



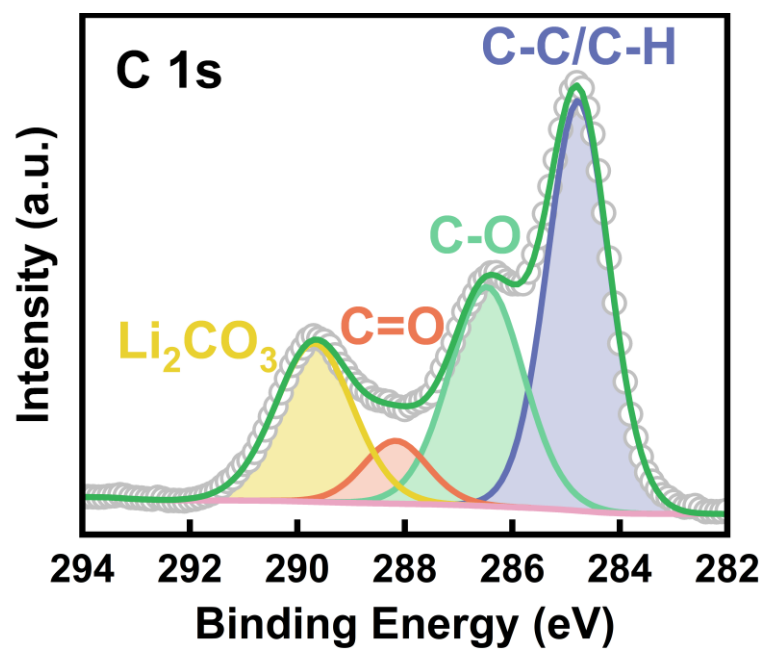

Fig. S24. Deconvoluted XPS peak of C 1s of SEI formed on LAG/LA103Z.

Table S1. Atomic percentage of chemical states calculated by deconvoluted XPS spectra of LAG and GO.

| Samples | Spectra | Chemical states                 | Atomic percentage |
|---------|---------|---------------------------------|-------------------|
| GO      | C 1s    | C-C/C-H                         | 43.6%             |
|         |         | C-O-H                           | 42.6%             |
|         |         | C=O                             | 13.8%             |
|         | O 1s    | C=O                             | 42.9              |
|         |         | C-O                             | 57.1              |
| LAG     | C 1s    | C-C/C-H                         | 45.5%             |
|         |         | C-O-C                           | 35.5%             |
|         |         | C=O                             | 9.1%              |
|         |         | Li <sub>2</sub> CO <sub>3</sub> | 9.9%              |
|         | O 1s    | Li <sub>2</sub> CO <sub>3</sub> | 34.4%             |
|         |         | C=O                             | 27.3%             |
|         |         | C-O                             | 38.3%             |
|         | N 1s    | AlN                             | 71.1%             |
|         |         | Li <sub>3</sub> N               | 28.9%             |
|         | F 1s    | MgF <sub>2</sub>                | 100%              |
|         | Li 1s   | Li <sub>3</sub> N               | 39.2%             |
|         |         | Li <sub>2</sub> CO <sub>3</sub> | 60.8%             |
|         | Al 2p   | AlN                             | 100%              |
|         | Mg 1s   | MgF <sub>2</sub>                | 100%              |

Table S2. Fitted EIS results of half-cells.

| Electrode              |     | $R_b$ ( $\Omega$ ) | $R_{SEI}$ ( $\Omega$ ) | $R_{CT}$ ( $\Omega$ ) | $\chi^2$ |
|------------------------|-----|--------------------|------------------------|-----------------------|----------|
| Before<br>cycle        | Cu  | 2.24               | /                      | 120                   | 0.069    |
|                        | AG  | 2.38               | /                      | 77.4                  | 0.030    |
|                        | LAG | 3.81               | /                      | 65.9                  | 0.005    |
| 50th cycle<br>SOC = 0% | Cu  | 21.7               | 157                    | 226                   | 0.052    |
|                        | AG  | 9.87               | 18.4                   | 59.8                  | 0.024    |
|                        | LAG | 7.02               | 10.0                   | 5.05                  | 0.031    |

Table S3. Physical parameters of the LA103Z foil.

| LA103Z foil                           |    |      |    |    |
|---------------------------------------|----|------|----|----|
|                                       | Li | Mg   | Al | Zn |
| Element contents (wt%)                | 10 | 84   | 3  | 3  |
| Thickness ( $\mu\text{m}$ )           |    | 50   |    |    |
| Density ( $\text{g cm}^{-3}$ )        |    | 1.45 |    |    |
| Areal density ( $\text{mg cm}^{-2}$ ) |    | 7.25 |    |    |

Table S4. Fitted EIS results of full-cells.

| Electrode              |            | $R_b$ ( $\Omega$ ) | $R_{SEI}$ ( $\Omega$ ) | $R_{CT}$ ( $\Omega$ ) | $\chi^2$ |
|------------------------|------------|--------------------|------------------------|-----------------------|----------|
| Before<br>cycle        | LAG        | 22.0               | 34.3                   | 22.9                  | 0.003    |
|                        | LA103Z     | 4.19               | 41.2                   | 80.5                  | 0.039    |
|                        | LAG/LA103Z | 4.04               | 10.5                   | 13.1                  | 0.006    |
| 30th cycle<br>SOC = 0% | LAG        | 14.5               | 12.0                   | 13.4                  | 0.002    |
|                        | LA103Z     | 10.9               | 10.0                   | 43.2                  | 0.053    |
|                        | LAG/LA103Z | 2.96               | 7.84                   | 10.9                  | 0.007    |

Table S5. Comparison of electrochemical performance of anode-free cells reported in previous works, corresponding to Fig. 4g.

| Design type | Areal capacity (mAh cm <sup>-2</sup> ) | Charge current density (mA cm <sup>-2</sup> ) | Discharge current density (mA cm <sup>-2</sup> ) | Electrolyte                                                             | Cycles | Capacity retention | Reference |
|-------------|----------------------------------------|-----------------------------------------------|--------------------------------------------------|-------------------------------------------------------------------------|--------|--------------------|-----------|
| Host        | 3.86                                   | 1.93                                          |                                                  | 1 M LiPF <sub>6</sub> in EC/DEC/DMC (1/1/1, in vol.) with 10 vol. % FEC | 50     | 71.4%              | This work |
|             |                                        |                                               |                                                  |                                                                         | 100    | 63.7%              |           |
|             |                                        |                                               |                                                  |                                                                         | 120    | 60.0%              |           |
| Host        | 4.2                                    | 2.1                                           |                                                  | 1.3 M LiPF <sub>6</sub> in EC/DEC (3/7, in vol.) with 10 % FEC          | 100    | 52%                | Ref 3     |
| Electrolyte | 3.1                                    | 0.62                                          | 1.55                                             | High-entropy fluorinated diethoxyethane-based F3-6DEE                   | 70     | 48%                | Ref 4     |
|             |                                        |                                               |                                                  | High-entropy carbonate-based EL5c                                       | 50     | 60%                |           |
| Host        | 1.7                                    | 0.34                                          |                                                  | 5 M LiFSI and 0.1 M LiPF <sub>6</sub> in FEC/DMC/TTE (1/2/2, in vol.)   | 100    | 50%                | Ref 5     |
| Host        | 1.8                                    | 0.9                                           |                                                  | 4 M LiFSI in DME                                                        | 100    | 46%                | Ref 6     |
| Electrolyte | 2.4                                    | 0.48                                          | 1.2                                              | 1 M LiBF <sub>4</sub> in FEC/DEC (1/2, in vol.)                         | 50     | 15%                | Ref 7     |
|             |                                        |                                               |                                                  | 0.6 M LiDFOB and 0.6 M LiBF <sub>4</sub> in FEC/DEC (1/2, in vol.)      | 100    | 52%                |           |
|             |                                        |                                               |                                                  | 1 M LiDFOB and 0.2 M LiBF <sub>4</sub> in FEC/DEC (1/2, in vol.)        | 100    | 72%                |           |
| Electrolyte | 2.04                                   | 0.204                                         | 1.02                                             | Carbonate-based LPFN-i2                                                 | 80     | 29%                | Ref 8     |
| Host        | 2.25                                   | 0.5                                           |                                                  | 1 M LiPF <sub>6</sub> in EC/DEC (1/1, in vol.) with 5 % FEC             | 60     | 56%                | Ref 9     |

| Design type | Areal capacity (mAh cm <sup>-2</sup> ) | Charge current density (mA cm <sup>-2</sup> ) | Discharge current density (mA cm <sup>-2</sup> ) | Electrolyte                                                                                  | Cycles | Capacity retention | Reference |
|-------------|----------------------------------------|-----------------------------------------------|--------------------------------------------------|----------------------------------------------------------------------------------------------|--------|--------------------|-----------|
| Electrolyte | 0.48                                   | 0.144                                         |                                                  | 0.15M LiNO <sub>3</sub> and 0.1 M LiPF <sub>6</sub> in SL/FB (1/1, in vol.) with 5 wt. % FEC | 50     | 57%                | Ref 10    |
| Electrolyte | 2                                      | 0.2                                           | 1                                                | Carbonate-based C-LDH-BE-LN                                                                  | 40     | 35%                | Ref 11    |
| Host        | 1                                      | 0.2                                           |                                                  | 1 M LiDFOB + 0.2 M LiBF <sub>4</sub> in FEC/DEC (1/2, in vol.)                               | 50     | 47%                | Ref 12    |
| Host        | 1.6                                    | 0.8                                           |                                                  | 1 M LiFSI in DME                                                                             | 40     | 22%                | Ref 13    |
| Interlayer  | 0.8                                    | 0.4                                           |                                                  | 1 M LiTFSI in DME/DOL (1/1, in vol.) with 3 wt. % LiNO <sub>3</sub>                          | 80     | 43%                | Ref 14    |
|             |                                        | 0.8                                           |                                                  |                                                                                              | 40     | 28%                |           |

Table S6. Atomic percentage of chemical states calculated by deconvoluted XPS spectra of SEI formed on LAG/LA103Z.

| Spectra | Chemical states                                | Atomic percentage |
|---------|------------------------------------------------|-------------------|
| C 1s    | C-C/C-H                                        | 43.7%             |
|         | C-O-H                                          | 25.1%             |
|         | C=O                                            | 5.8%              |
|         | Li <sub>2</sub> CO <sub>3</sub>                | 25.4%             |
| O 1s    | Li <sub>2</sub> CO <sub>3</sub>                | 51.3%             |
|         | C=O                                            | 36.0%             |
|         | C-O                                            | 12.7%             |
| N 1s    | Li <sub>3</sub> N                              | 82.3%             |
|         | Li <sub>x</sub> NO <sub>y</sub>                | 17.7%             |
| F 1s    | LiF                                            | 61.4%             |
|         | Li <sub>x</sub> PO <sub>y</sub> F <sub>z</sub> | 31.5%             |
|         | Li <sub>x</sub> PF <sub>y</sub>                | 7.1%              |
| Li 1s   | ROCO <sub>2</sub> -Li                          | 4.5%              |
|         | Li <sub>2</sub> CO <sub>3</sub>                | 26.4%             |
|         | Li <sub>3</sub> N                              | 18.8%             |
|         | LiF                                            | 50.3%             |



## References

1. Y. Zhu, S. Murali, M. D. Stoller, K. J. Ganesh, W. Cai, P. J. Ferreira, A. Pirkle, R. M. Wallace, K. A. Cychosz, M. Thommes, D. Su, E. A. Stach and R. S. Ruoff, *Science*, 2011, **332**, 1537-1541.
2. Z. Tan, K. Ni, G. Chen, W. Zeng, Z. Tao, M. Ikram, Q. Zhang, H. Wang, L. Sun, X. Zhu, X. Wu, H. Ji, R. S. Ruoff and Y. Zhu, *Adv. Mater.*, 2017, **29**, 1603414.
3. S. Cho, D. Y. Kim, J.-I. Lee, J. Kang, H. Lee, G. Kim, D.-H. Seo and S. Park, *Adv. Funct. Mater.*, 2022, **32**, 2208629.
4. S. C. Kim, J. Wang, R. Xu, P. Zhang, Y. Chen, Z. Huang, Y. Yang, Z. Yu, S. T. Oyakhire, W. Zhang, L. C. Greenburg, M. S. Kim, D. T. Boyle, P. Sayavong, Y. Ye, J. Qin, Z. Bao and Y. Cui, *Nat. Energy*, 2023, **8**, 814-826.
5. X. Liao, X. Wang, C. Yan, B. Zhang, Y. Ni, H. Yuan, Y. Pan, J. a. Pan and J. Huang, *Adv. Funct. Mater.*, 2024, DOI: 10.1002/adfm.202310925, 2310925.
6. W. Chen, R. V. Salvatierra, M. Ren, J. Chen, M. G. Stanford and J. M. Tour, *Adv. Mater.*, 2020, **32**, 2002850.
7. R. Weber, M. Genovese, A. J. Louli, S. Hames, C. Martin, I. G. Hill and J. R. Dahn, *Nat. Energy*, 2019, **4**, 683-689.
8. Z. Wen, W. Fang, X. Wu, Z. Qin, H. Kang, L. Chen, N. Zhang, X. Liu and G. Chen, *Adv. Funct. Mater.*, 2022, **32**, 2204768.
9. Z. T. Wondimkun, W. A. Tegegne, J. Shi-Kai, C.-J. Huang, N. A. Sahalie, M. A. Weret, J.-Y. Hsu, P.-L. Hsieh, Y.-S. Huang, S.-H. Wu, W.-N. Su and B. J. Hwang, *Energy Storage Mater.*, 2021, **35**, 334-344.
10. P. Li, H. Zhang, J. Lu and G. Li, *Angew. Chem. Int. Ed.*, 2023, **62**, e202216312.
11. F. Wang, Z. Wen, Z. Zheng, W. Fang, L. Chen, F. Chen, N. Zhang, X. Liu, R. Ma and G. Chen, *Adv. Energy Mater.*, 2023, **13**, 2203830.
12. T. T. K. Ingber, M. M. Bela, F. Püttmann, J. F. Dohmann, P. Bieker, M. Börner, M. Winter and M. C. Stan, *J. Mater. Chem. A*, 2023, **11**, 17828-17840.
13. J. Jung, J. Y. Kim, I. J. Kim, H. Kwon, G. Kim, G. Doo, W. Jo, H.-T. Jung and H.-T. Kim, *J. Mater. Chem. A*, 2022, **10**, 20984-20992.
14. O. Tamwattana, H. Park, J. Kim, I. Hwang, G. Yoon, T.-h. Hwang, Y.-S. Kang, J. Park, N. Meethong and K. Kang, *ACS Energy Lett.*, 2021, **6**, 4416-4425.
